# Supplementary material for: Novel Ubiquitin Specific Protease-13 Inhibitors Alleviate Neurodegenerative Pathology
Source: MDPI journal article supplement (doi:10.3390/metabo11090622), 2021-09-15
Supplement: s1 [file s1]

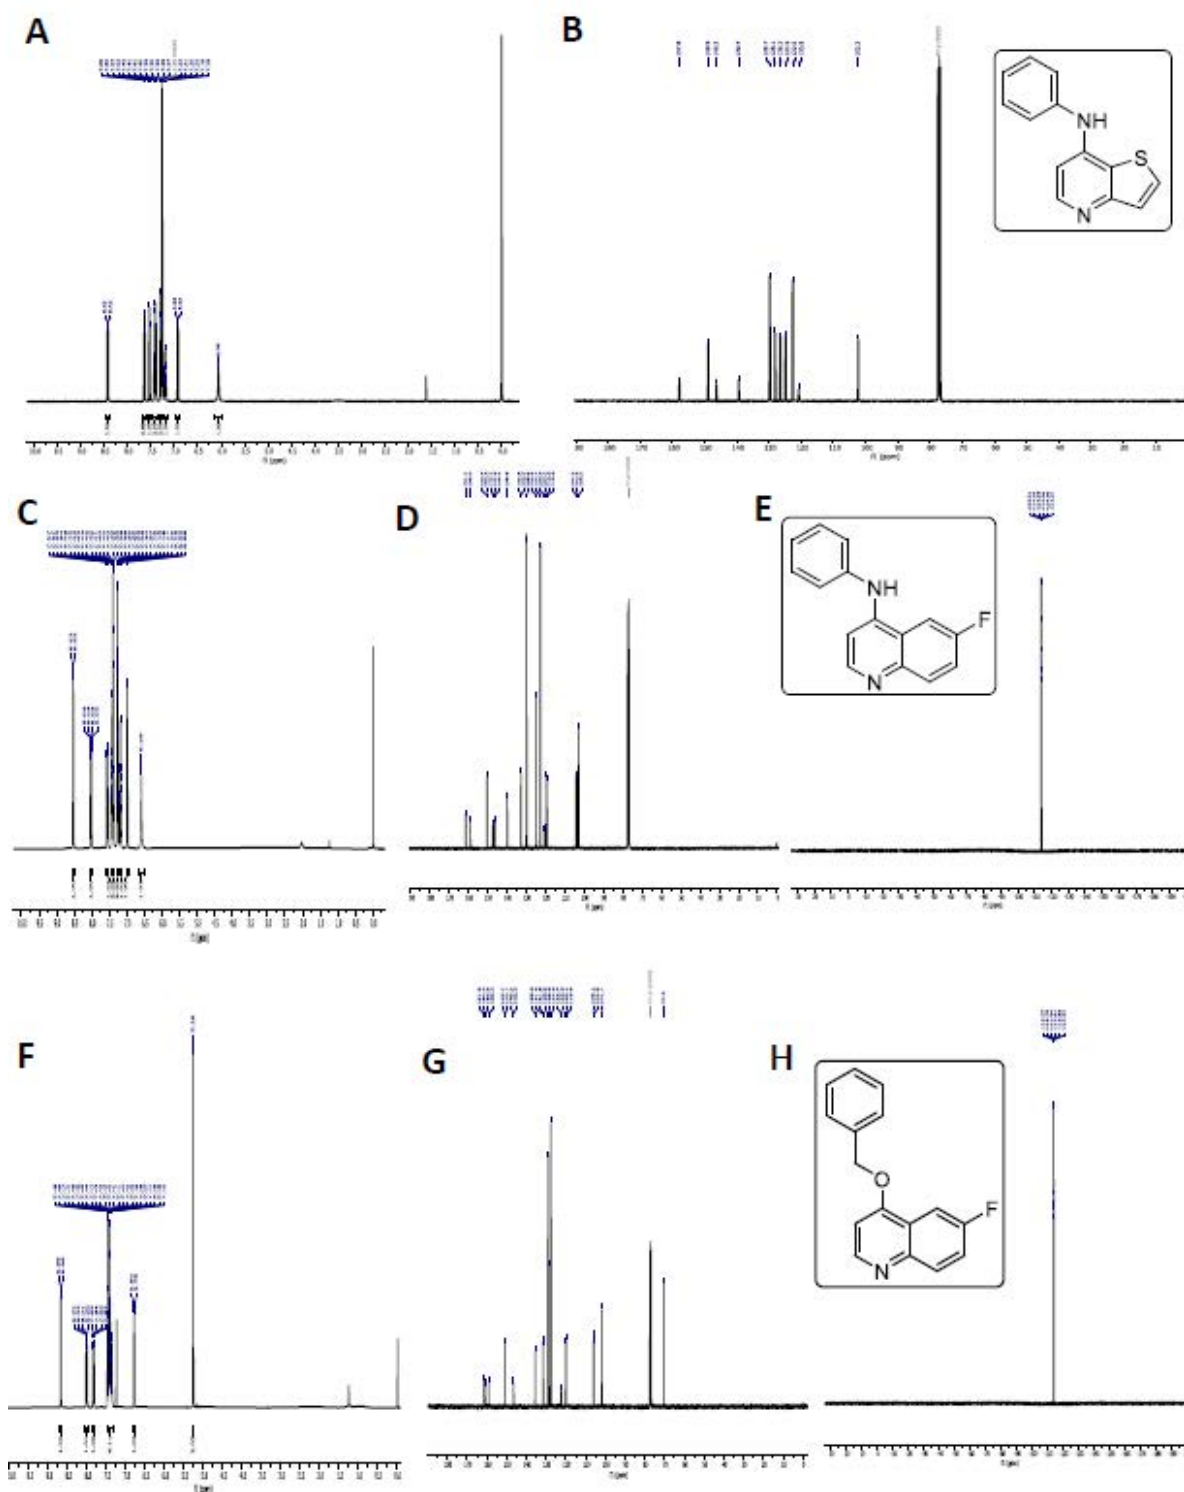

## NMR Spectra of BK50118-A, BK50118-B and BK50118-C

Suppl Figure S1. NMR Spectra of BK50118-A, BK50118-B and BK50118-C.

A <sup>1</sup>H NMR Spectrum of N-phenylthieno[3,2-b]pyridin-7-amine (BK50118-A).

B <sup>13</sup>C NMR Spectrum of N-phenylthieno[3,2-b]pyridin-7-amine (BK50118-A).

- C  $^1\text{H}$  NMR Spectrum of 6-fluoro-N-phenylquinolin-4-amine (BK50118-B).
- D  $^{13}\text{C}$  NMR Spectrum of 6-fluoro-N-phenylquinolin-4-amine (BK50118-B).
- E  $^{19}\text{F}$  NMR Spectrum of 6-fluoro-N-phenylquinolin-4-amine (BK50118-B).
- F  $^1\text{H}$  NMR Spectrum of 4-(benzyloxy)-6-fluoroquinoline (BK50118-C).
- G  $^{13}\text{C}$  NMR Spectrum of 4-(benzyloxy)-6-fluoroquinoline (BK50118-C).
- H  $^{19}\text{F}$  NMR Spectrum of 4-(benzyloxy)-6-fluoroquinoline (BK50118-C).

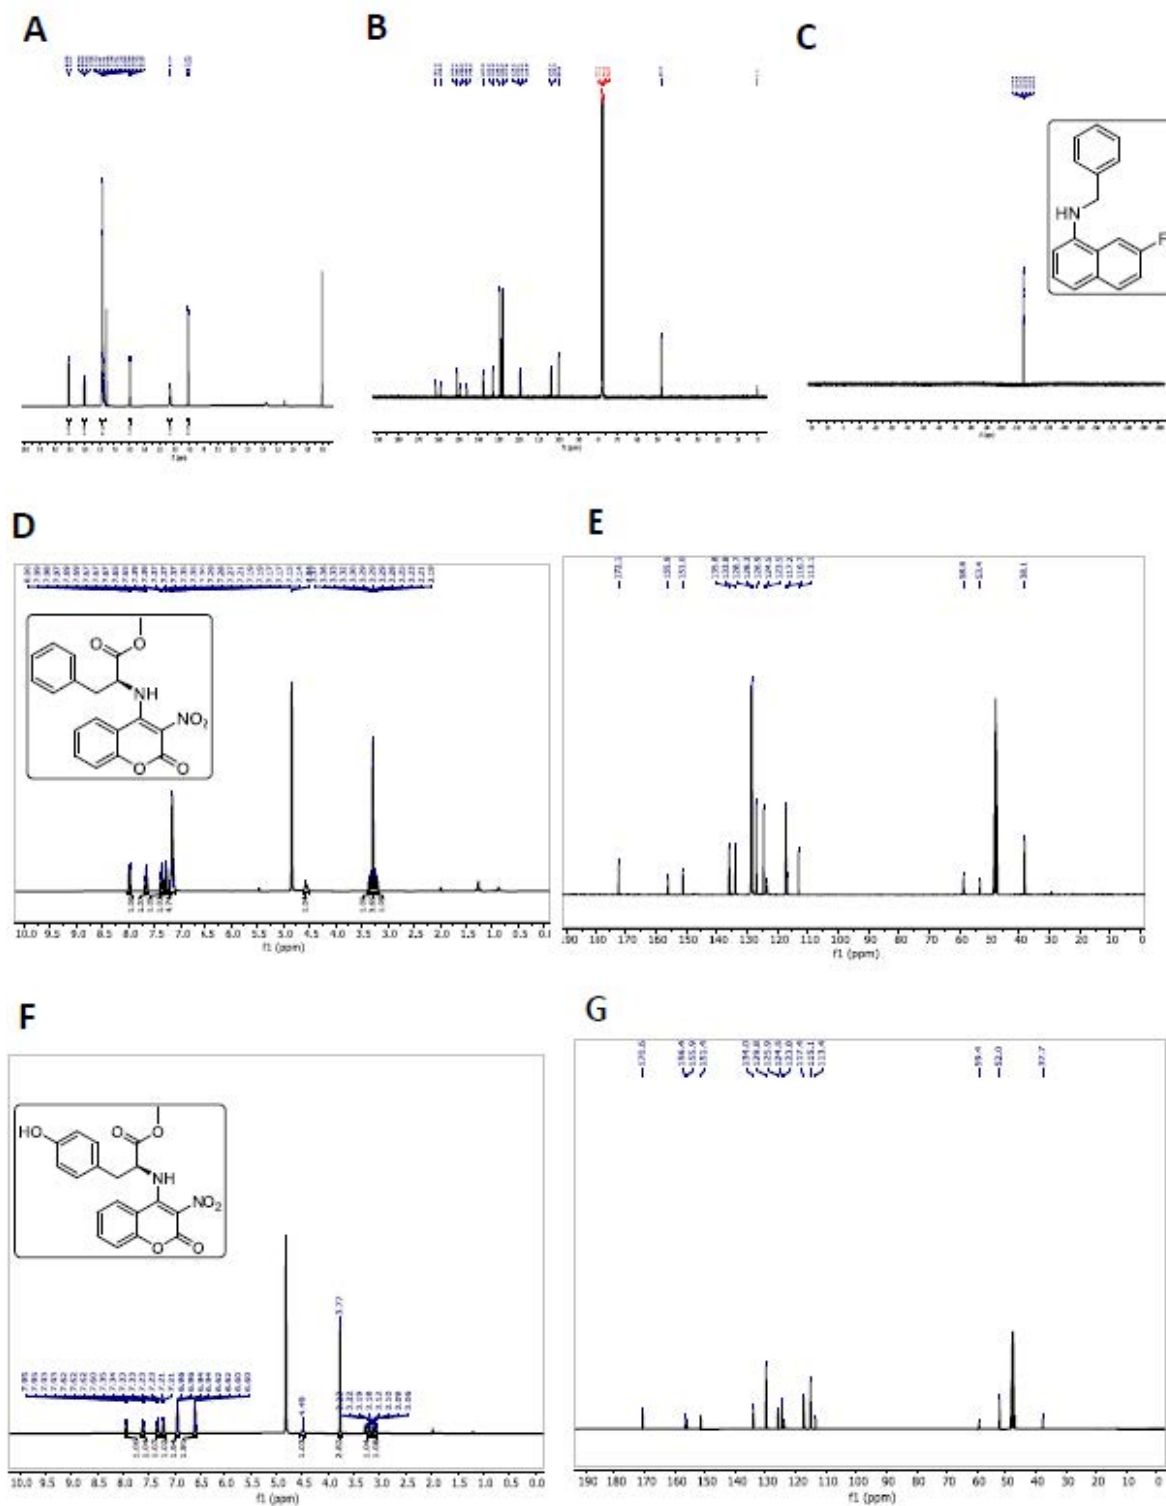

## NMR Spectra of CL3-499, CL3-512 and CL3-514

Suppl Figure S2. NMR Spectra of CL3-499, CL3-512 and CL3-514.

A <sup>1</sup>H NMR Spectrum of N-benzyl-6-fluoroquinolin-4-amine (CL3-499).

B <sup>13</sup>C NMR Spectrum of N-benzyl-6-fluoroquinolin-4-amine (CL3-499).

C  $^{19}\text{F}$  NMR Spectrum of N-benzyl-6-fluoroquinolin-4-amine (CL3-499).

D  $^1\text{H}$  NMR Spectrum of (S)-methyl (3-nitro-2-oxo-2H-chromen-4-yl)-phenylalaninate (CL3-512).

E  $^{13}\text{C}$  NMR Spectrum of (S)-methyl (3-nitro-2-oxo-2H-chromen-4-yl)-phenylalaninate (CL3-512).

F  $^1\text{H}$  NMR Spectrum of (S)-methyl (3-nitro-2-oxo-2H-chromen-4-yl)-tyrosinate (CL3-514).

G  $^{13}\text{C}$  NMR Spectrum of (S)-Methyl (3-nitro-2-oxo-2H-chromen-4-yl)-tyrosinate (CL3-514).

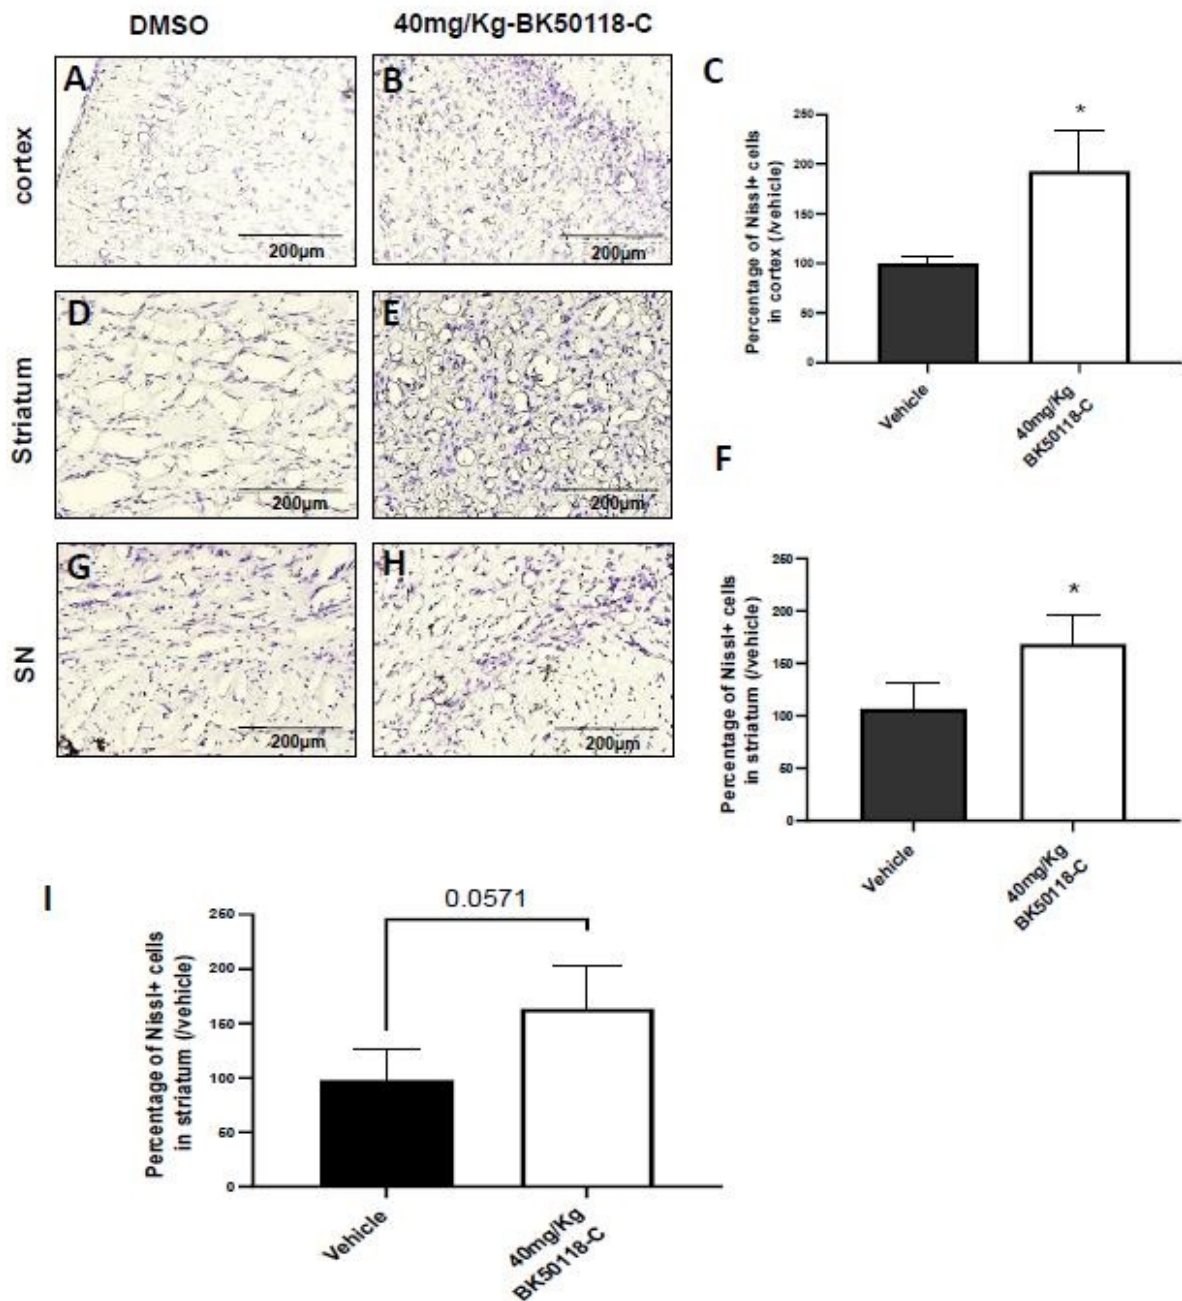

**Suppl Figure S3. BK50118-C improved cell survivals in TgA53T mice.** Male and female TgA53T mice were treated with intraperitoneal injection of vehicle or BK50118-C at the daily dosage of 40 mg/Kg for 7 days. Nissl staining showed BK50118-C significantly increased the neuron counts in cortex **B)**, striatum **E)** and substantia nigra (SN) **H)** compared to corresponding vehicles **A), D) and G)**, verified

by quantification of Nissl+ cells in cortex **C**), striatum **F**) and SN **I**). Asterisk indicates statistic significant difference vs vehicle. \*  $p < 0.05$  vs vehicle. Two-tailed student's t test was used for analysis. N=3-4 mice per group. All values presented as Mean $\pm$ SD.

Scale bars: 200 $\mu$ m.

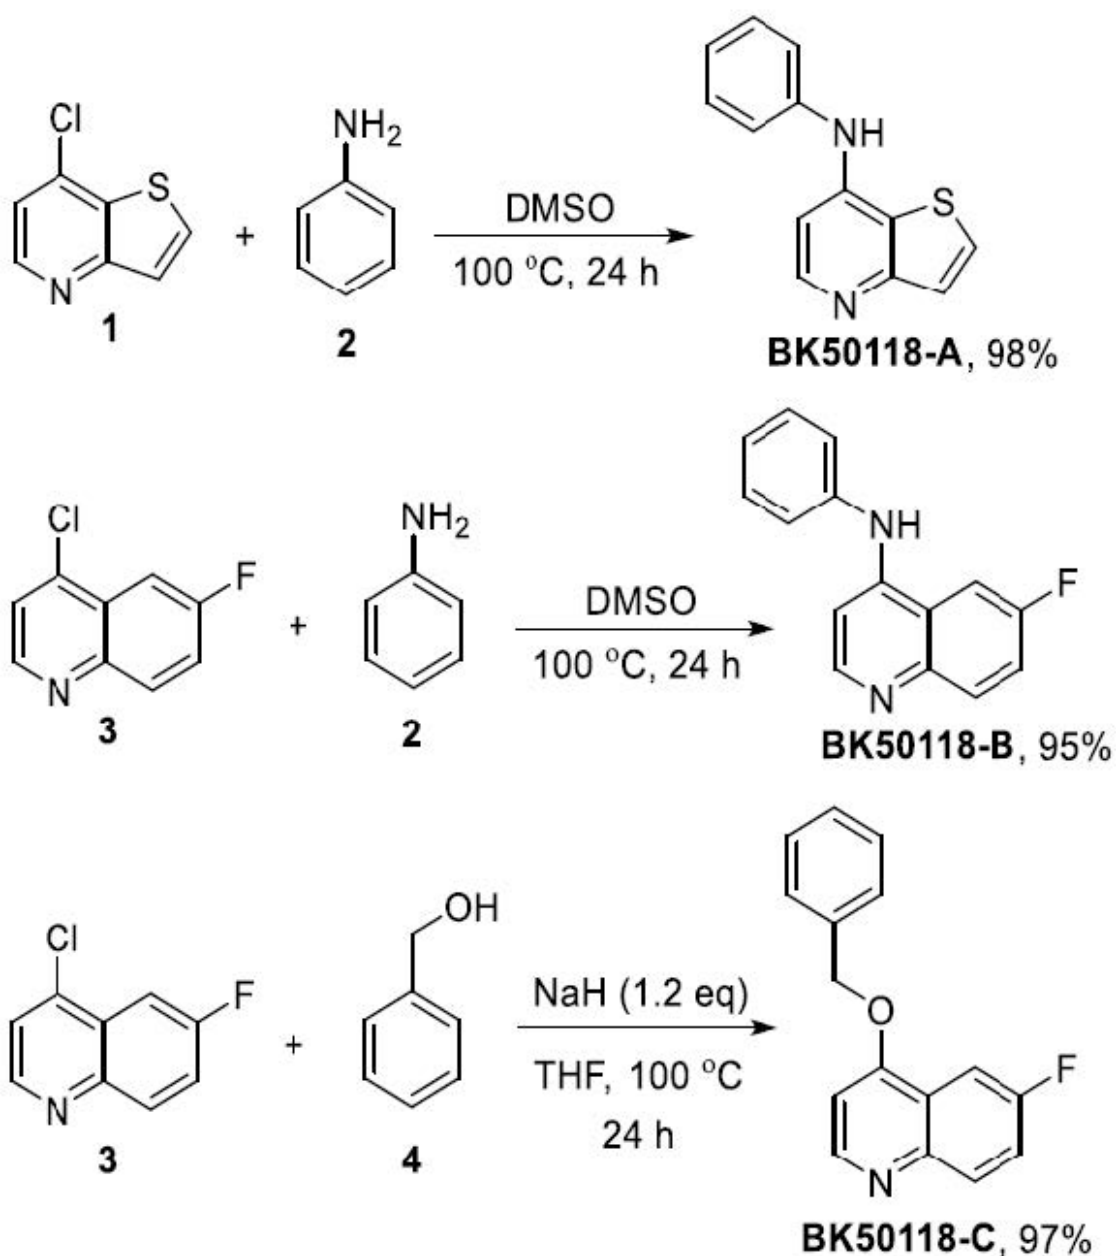

### Synthesis of BK50118-A, BK50118-B and BK50118-C

Suppl Figure S4. Synthesis of BK50118-A, BK50118-B and BK50118-C.

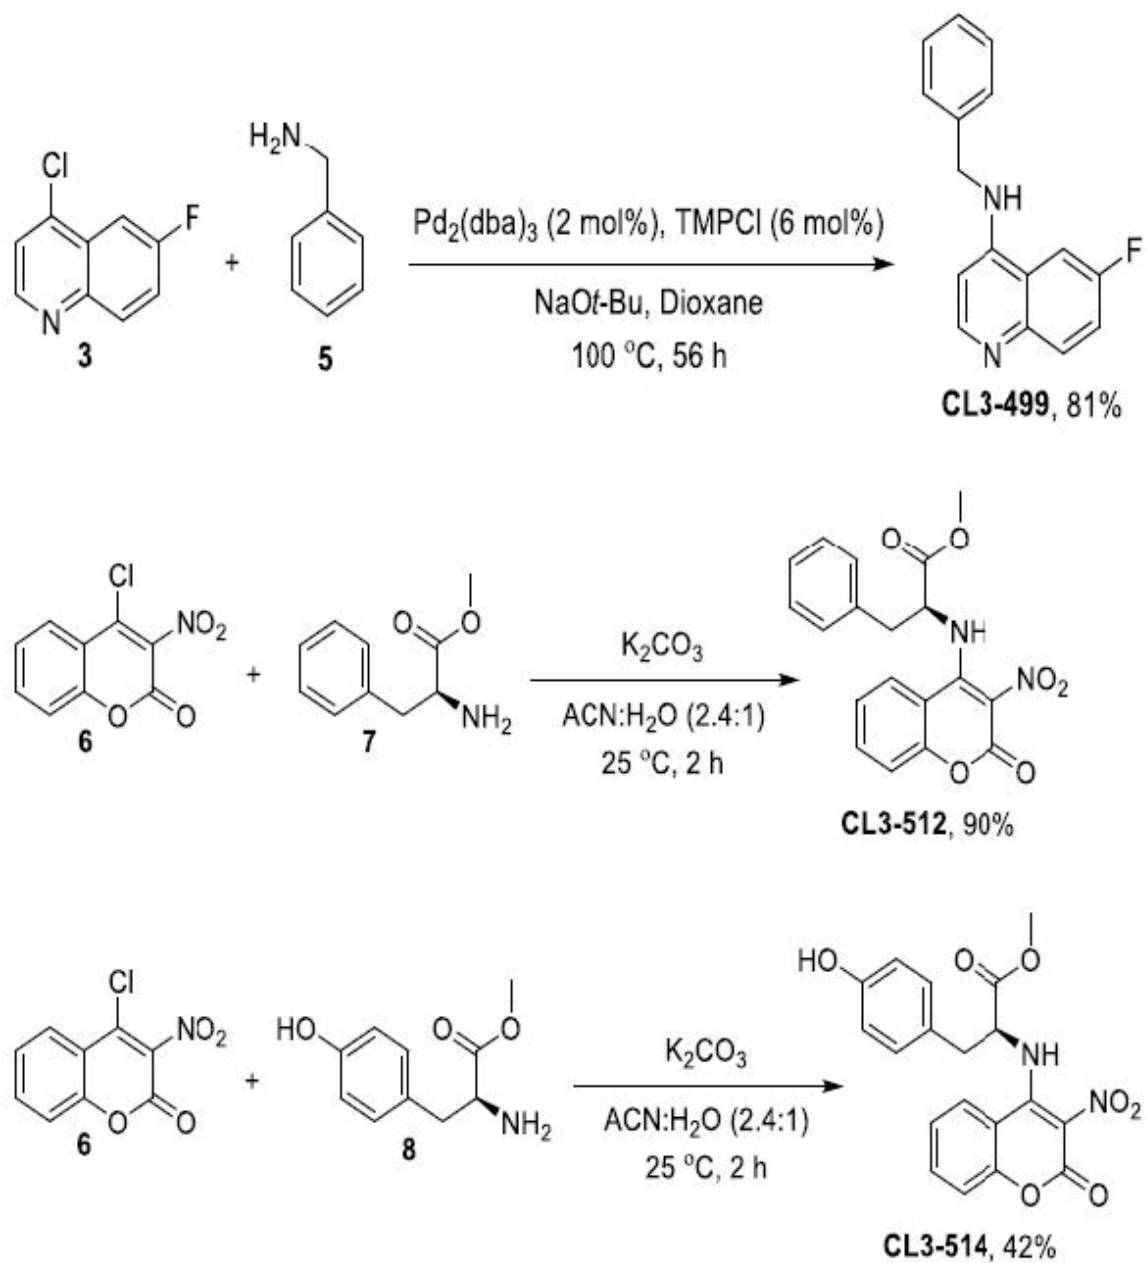

### Synthesis of CL3-499, CL3-512 and CL3-514

Suppl Figure S5. Synthesis of CL3-499, CL3-512 and CL3-514.
